# Supplementary material
Source: MDPI journal article supplement (https://www.mdpi.com/1424-8247/14/10/959)
Supplement: s1 [file s1]

## SUPPLEMENTARY MATERIALS

### Discovery of a novel tetrapeptide against Influenza A virus: rational design, synthesis, bioactivity evaluation and computational studies.

*Maria Carmina Scala<sup>a, §</sup>, Mariangela Agamennone<sup>b, §</sup>, Agostina Pietrantonio<sup>c, d</sup>, Veronica Di Sarno<sup>a</sup>, Alessia Bertamino<sup>a</sup>, Fabiana Superti<sup>c</sup>, Pietro Campiglia<sup>a</sup> and Marina Sala<sup>a, \*</sup>*

<sup>a</sup>Department of Pharmacy, University of Salerno, Via Giovanni Paolo II 132, 84084, Fisciano (SA), Italy

<sup>b</sup>Department of Pharmacy, University “G. d’Annunzio” of Chieti-Pescara, Via dei Vestini 31, 66100, Chieti, Italy

<sup>c</sup>National Centre for Innovative Technologies in Public Health, National Institute of Health, Viale Regina Elena 299, 00161, Rome, Italy

<sup>d</sup>Core Facilities, National Institute of Health, Viale Regina Elena 299, 00161, Rome, Italy

\* Corresponding author: msala@unisa.it; Tel.: 089968148

§ These authors contributed equally to this work

#### Table of contents:

#### Supplementary schemes and figures:

|                        |                                                                             |     |
|------------------------|-----------------------------------------------------------------------------|-----|
| <b>Table S1:</b>       | Analytical data of peptides <b>1-10</b> .....                               | S2  |
| <b>Figure S1-S8:</b>   | HRMS spectra and HPLC chromatograms of peptide <b>3-10</b> .....            | S2  |
| <b>Figure S9-S15:</b>  | Sensorgrams of peptides <b>3, 5-10</b> .....                                | S10 |
| <b>Figure S16-S19:</b> | MST binding curves of peptides <b>2, 3, 5-10</b> .....                      | S13 |
| <b>Table S2:</b>       | Swiss-Model data of homology models .....                                   | S14 |
| <b>Table S3:</b>       | Score values obtained for the best homology models .....                    | S15 |
| <b>Figure S20:</b>     | Ramachandran Plots of HA homology models .....                              | S15 |
| <b>Figure S21:</b>     | Alignment of HA sequences of A/Parma and A/Roma H1N1 strains .....          | S16 |
| <b>Figure S22:</b>     | Docked poses of peptide <b>2</b> .....                                      | S17 |
| <b>Figure S23:</b>     | Superposition of the complex of HA:sialic acid with docked pose of SAHS ... | S18 |

**Table S1.** Analytical data of peptides **3-10**.

| Pep.                 | Sequence | HPLC<br>k' <sup>a</sup> | HRMS      |
|----------------------|----------|-------------------------|-----------|
| <b>1<sup>a</sup></b> | SKHS     | 4.68                    | 499.26235 |
| <b>3</b>             | AKHS     | 1.10                    | 483.2659  |
| <b>4</b>             | SAHS     | 0.54                    | 443.1667  |
| <b>5</b>             | SKAS     | 1.85                    | 434.2055  |
| <b>6</b>             | SKHA     | 4.37                    | 483.2654  |
| <b>2<sup>a</sup></b> | SLDC     | 3.93                    | 477.18970 |
| <b>7</b>             | ALDC     | 5.67                    | 462.2003  |
| <b>8</b>             | SADC     | 3.50                    | 436.1484  |
| <b>9</b>             | SLAC     | 5.16                    | 434.2050  |
| <b>10</b>            | SLDA     | 5.93                    | 446.2235  |

<sup>a</sup> k'=[(peptide retention time-solvent retention time)/solvent retention time].

### Supplementary figures of Mass spectrometry and HPLC of peptides used in the study

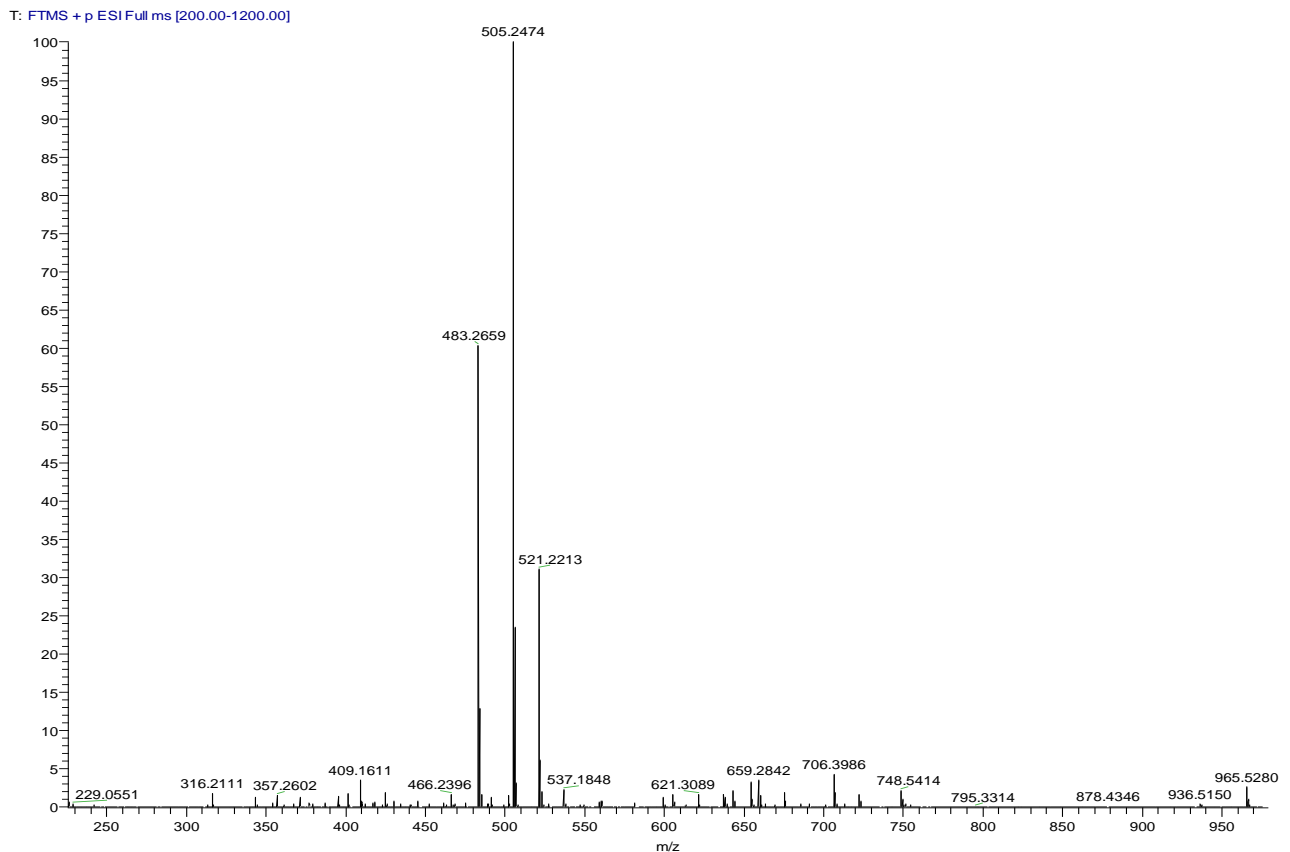

Datafile Name: Peptide 3

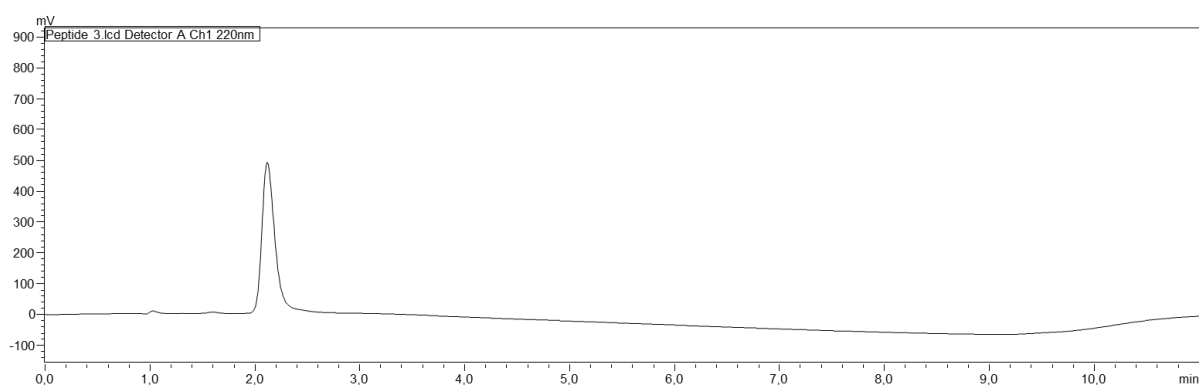

**Figure S1.** HR-ESI-MS of Peptide 3 ion  $[M+H]^+$  and analytical HPLC trace at 220 nm.

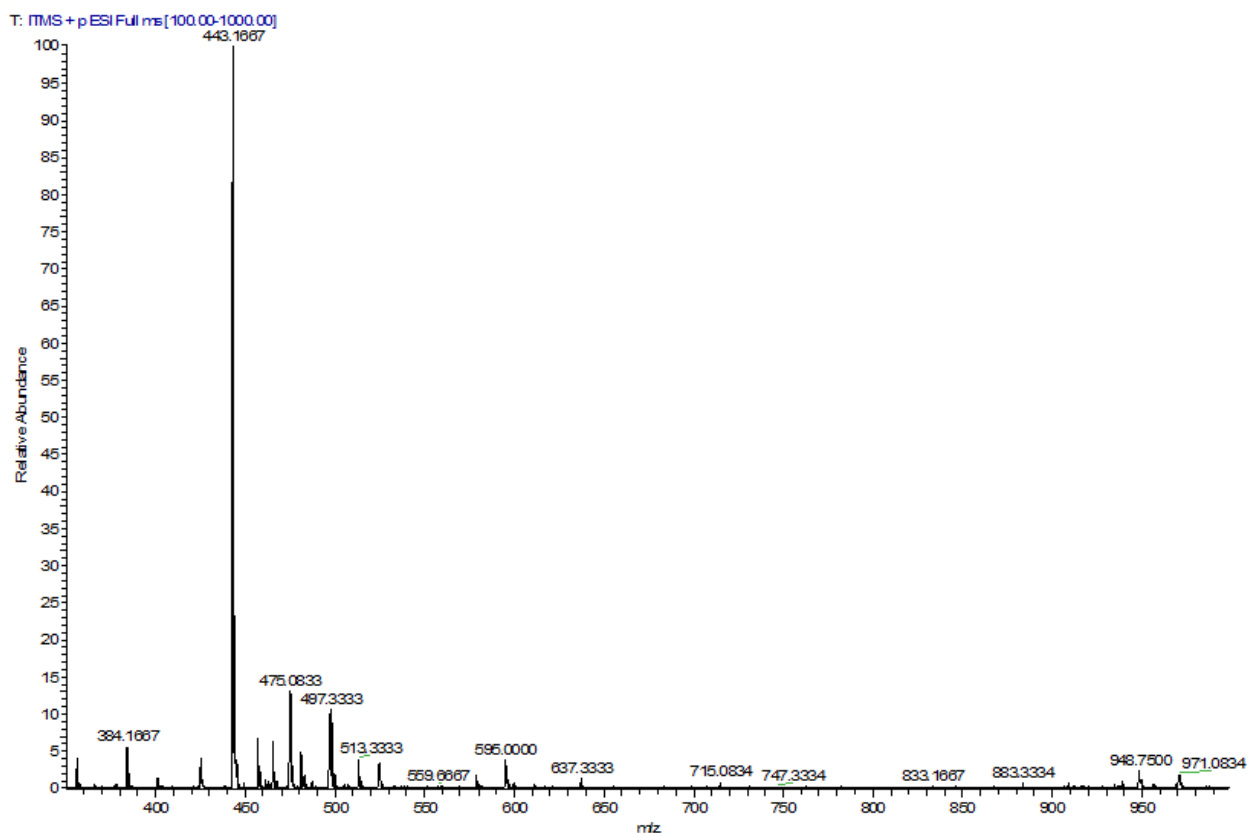

Datafile Name: Peptide 4

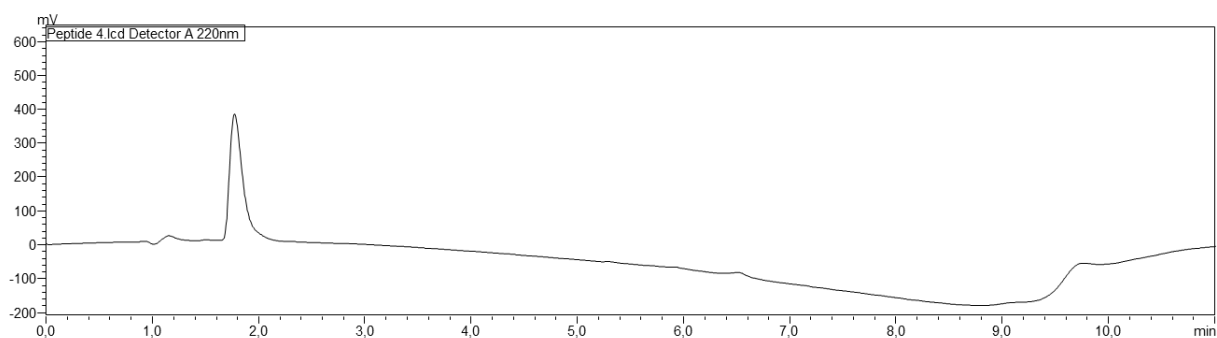

**Figure S2.** HR-ESI-MS of Peptide 4 ion  $[M+H]^+$  and analytical HPLC trace at 220 nm.

T: FTMS + p ESI Full ms [150.00-1500.00]

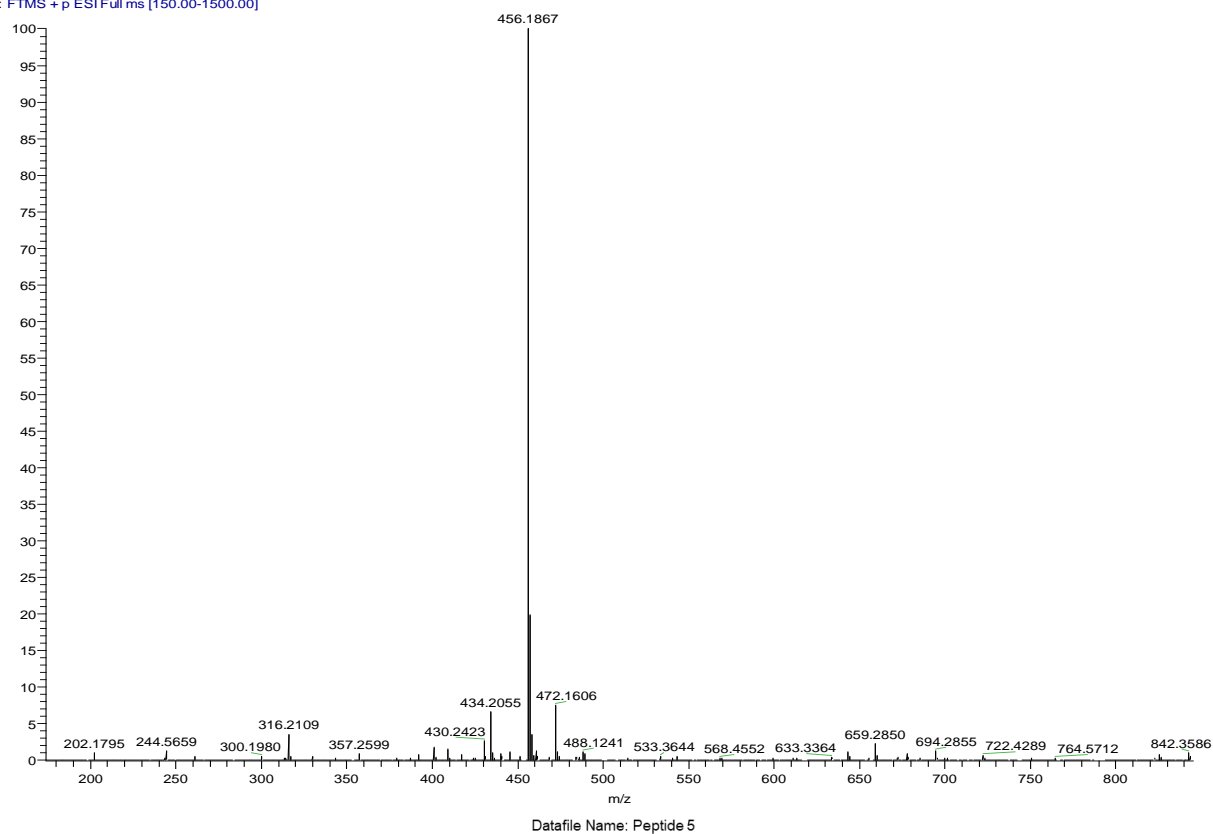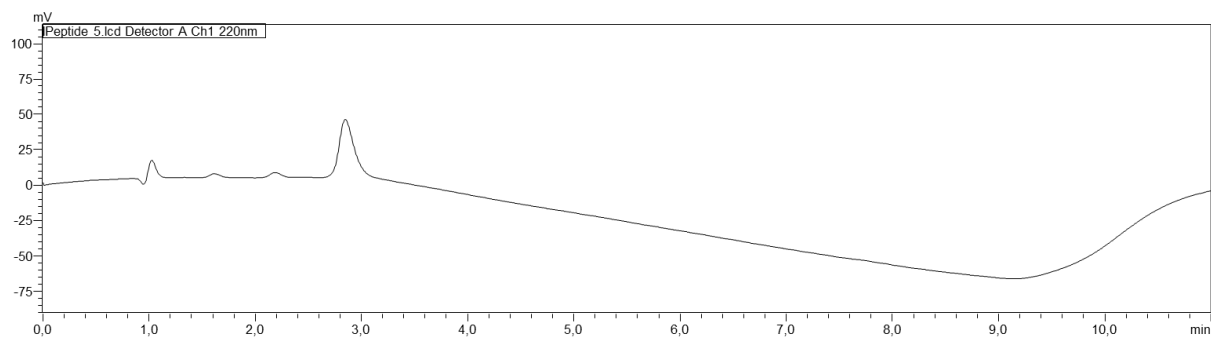

**Figure S3.** HR-ESI-MS of Peptide 5 ion  $[M+H]^+$  and analytical HPLC trace at 220 nm.

T: FTMS + p ESI Full ms [200.00-1200.00]

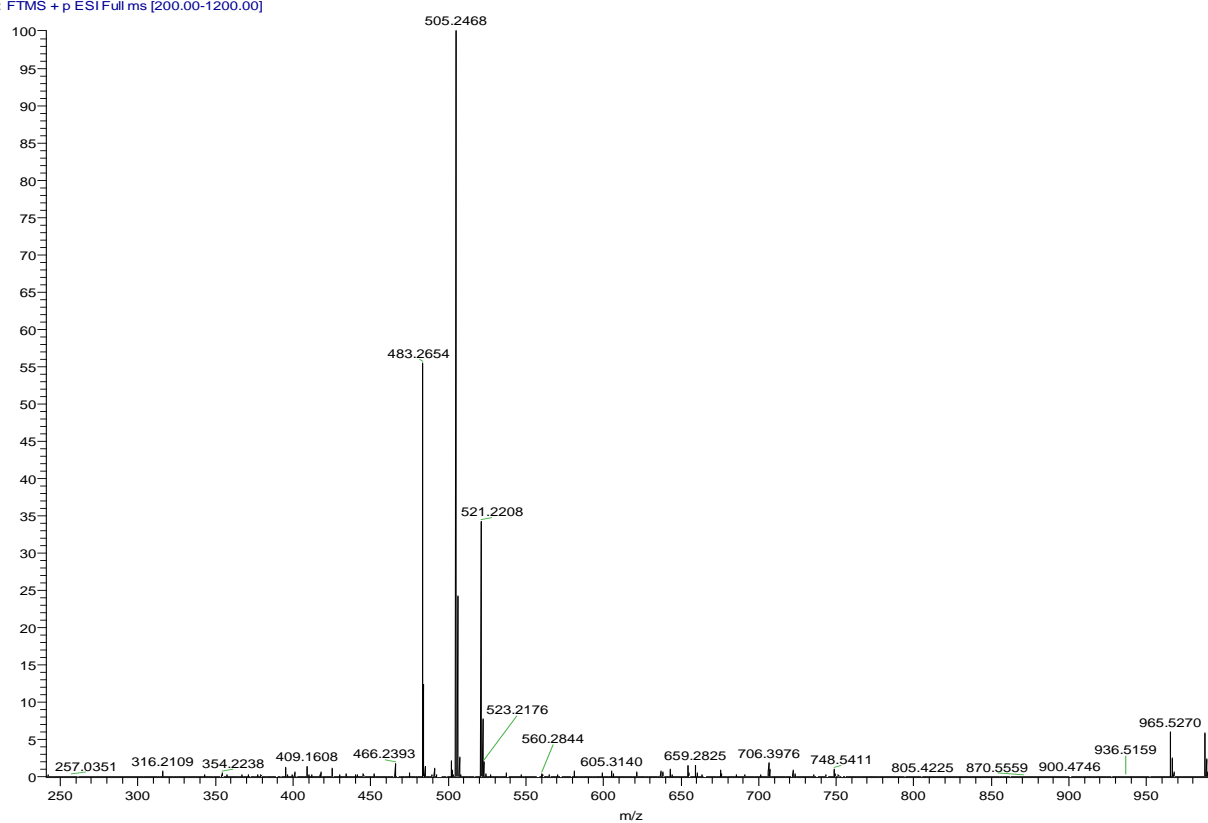

Datafile Name: Peptide 6

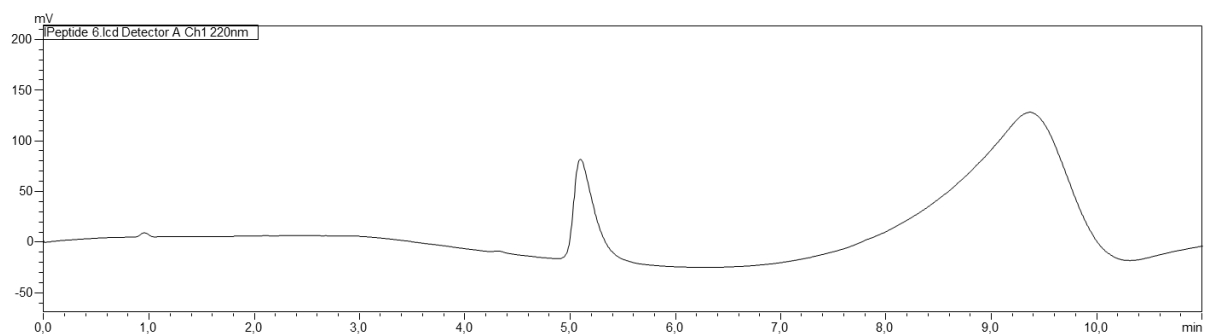

**Figure S4.** HR-ESI-MS of Peptide 6 ion  $[M+H]^+$  and analytical HPLC trace at 220 nm.

T: FTMS + p ESI Full ms [150.00-1500.00]

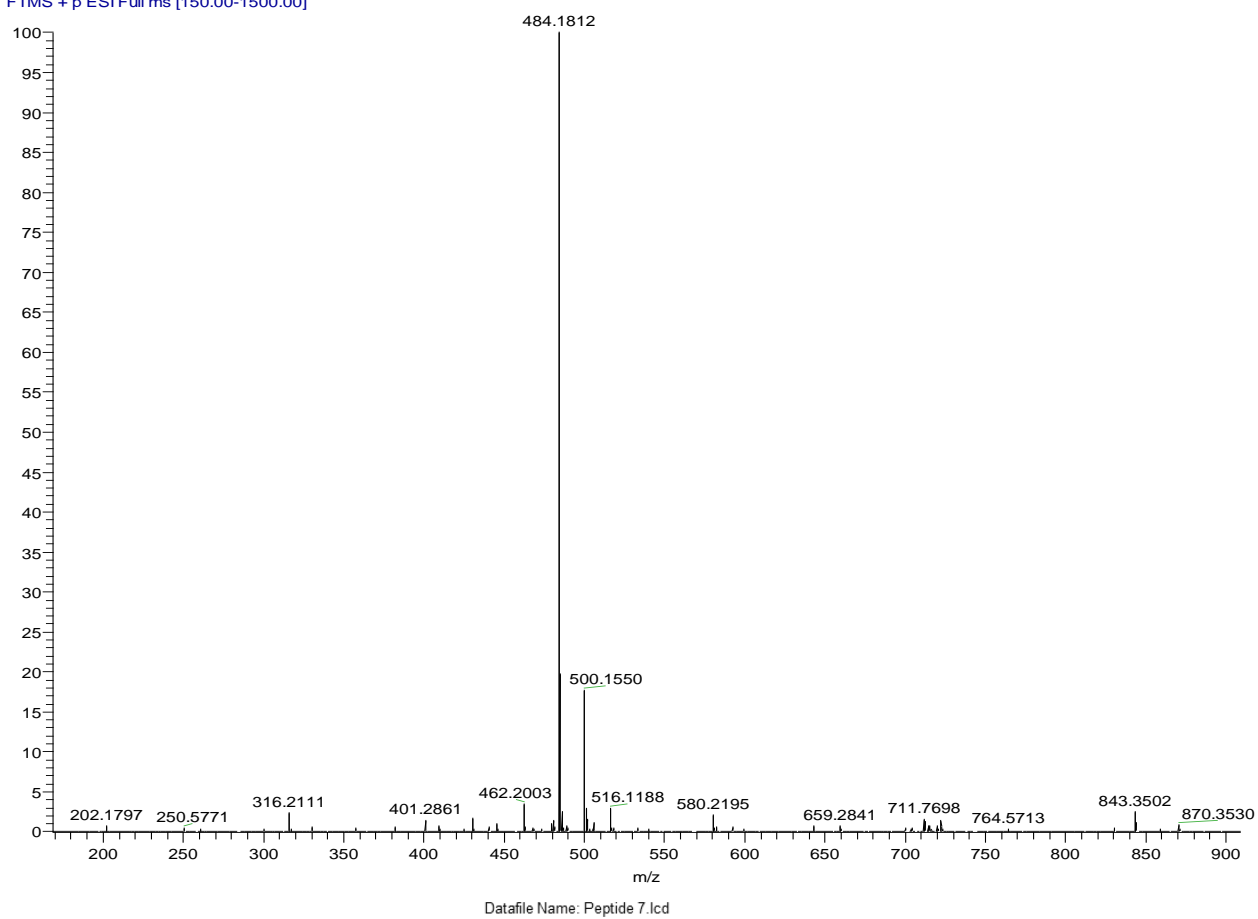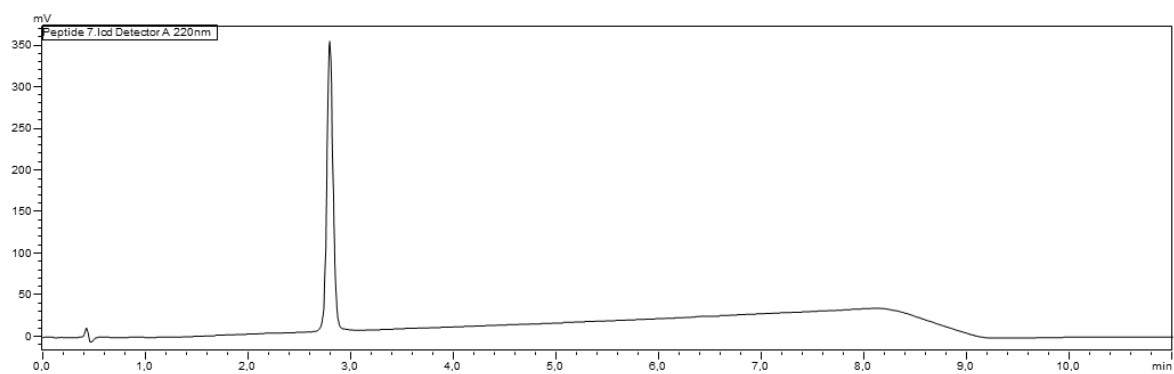

**Figure S5.** HR-ESI-MS of Peptide 7 ion  $[M+H]^+$  and analytical HPLC trace at 220 nm.

T: FTMS + p ESI Full ms [150.00-1500.00]

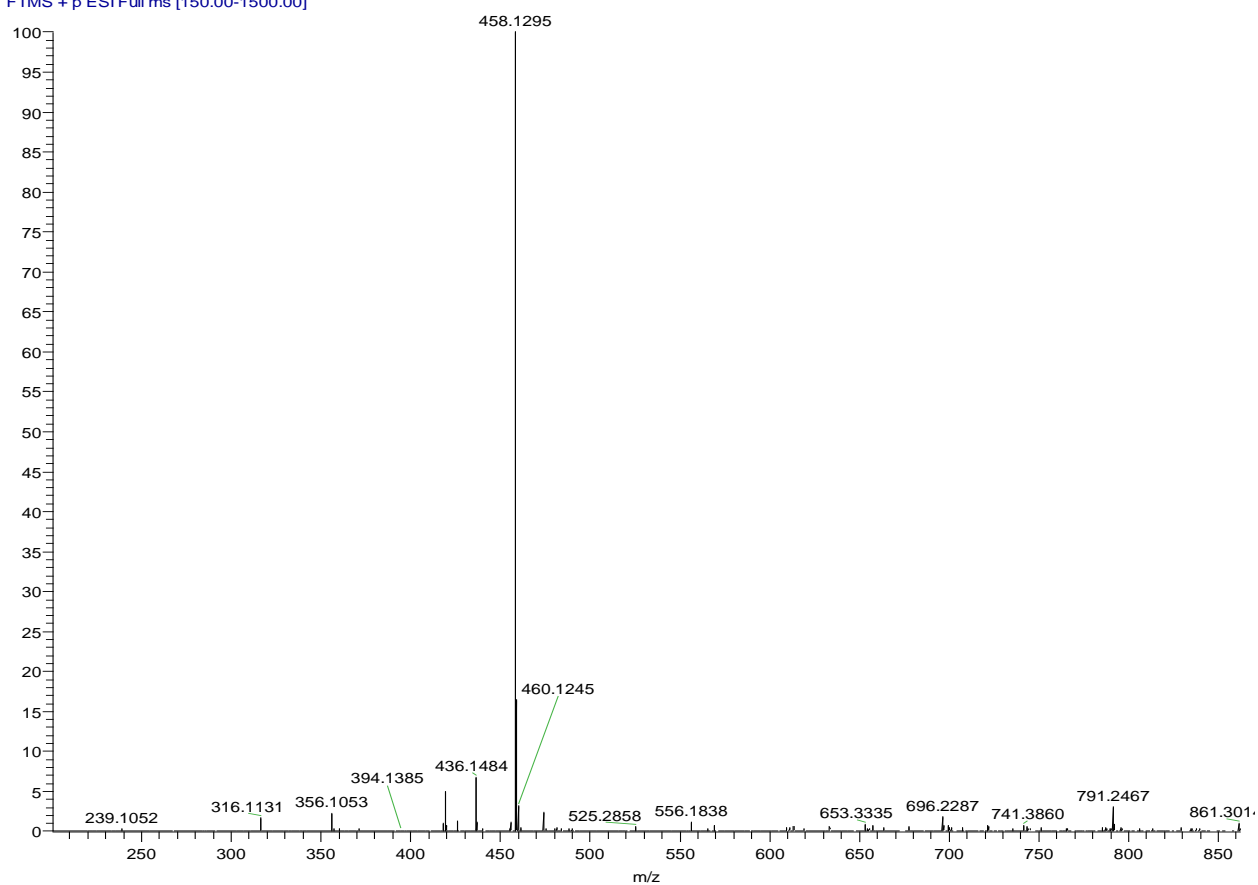

Datafile Name: Peptide 8.lcd

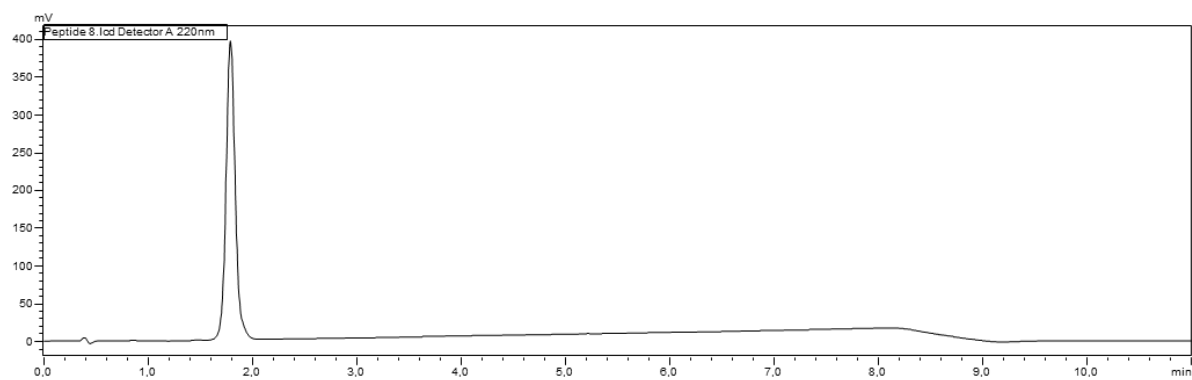

**Figure S6.** HR-ESI-MS of Peptide **8** ion  $[M+H]^+$  and analytical HPLC trace at 220 nm.

T: FTMS + p ESI Full ms [150.00-1500.00]

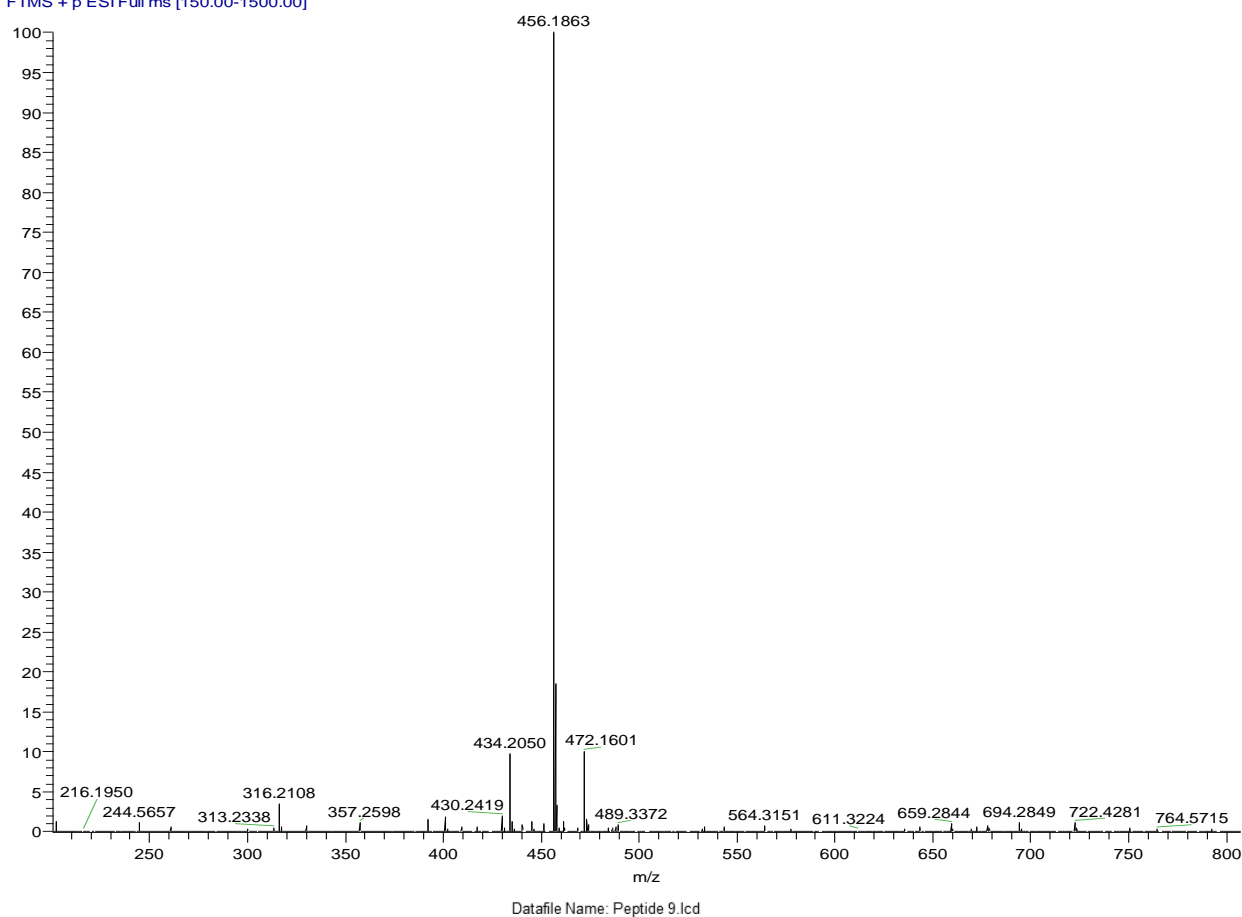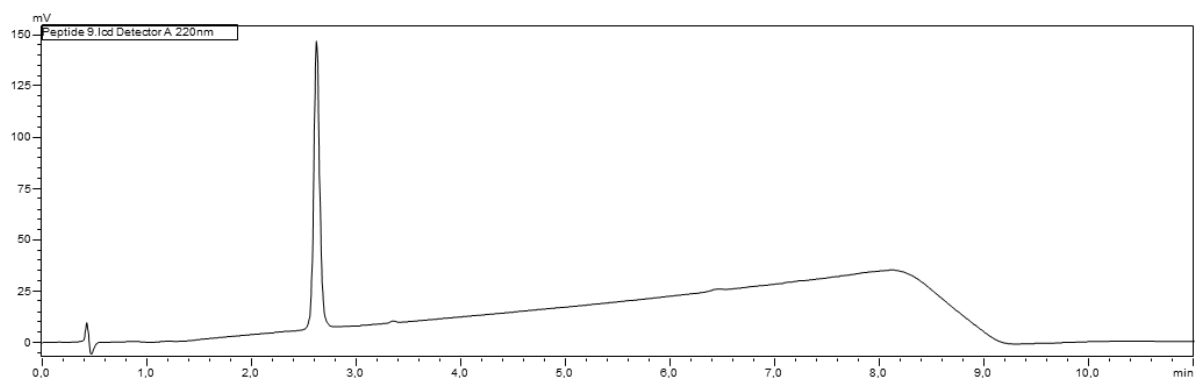

**Figure S7.** HR-ESI-MS of Peptide **9** ion  $[M+H]^+$  and analytical HPLC trace at 220 nm.



T: FTMS + p ESI Full ms [150.00-1500.00]

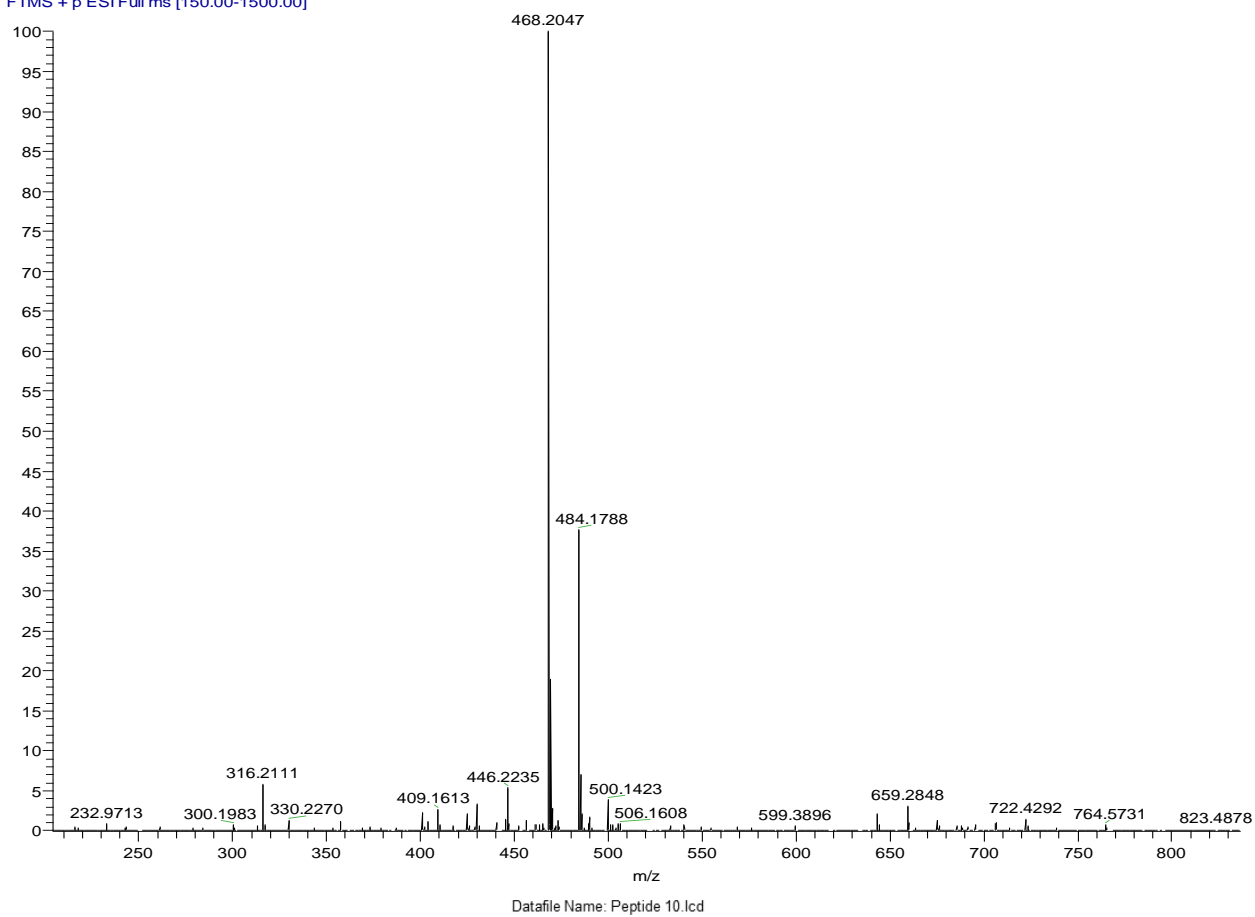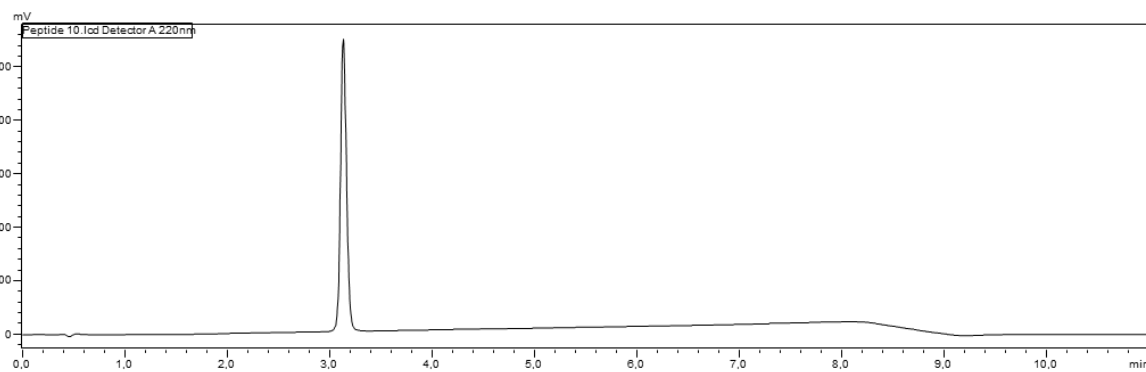

**Figure S8.** HR-ESI-MS of Peptide **10** ion  $[M+H]^+$  and analytical HPLC trace at 220 nm.

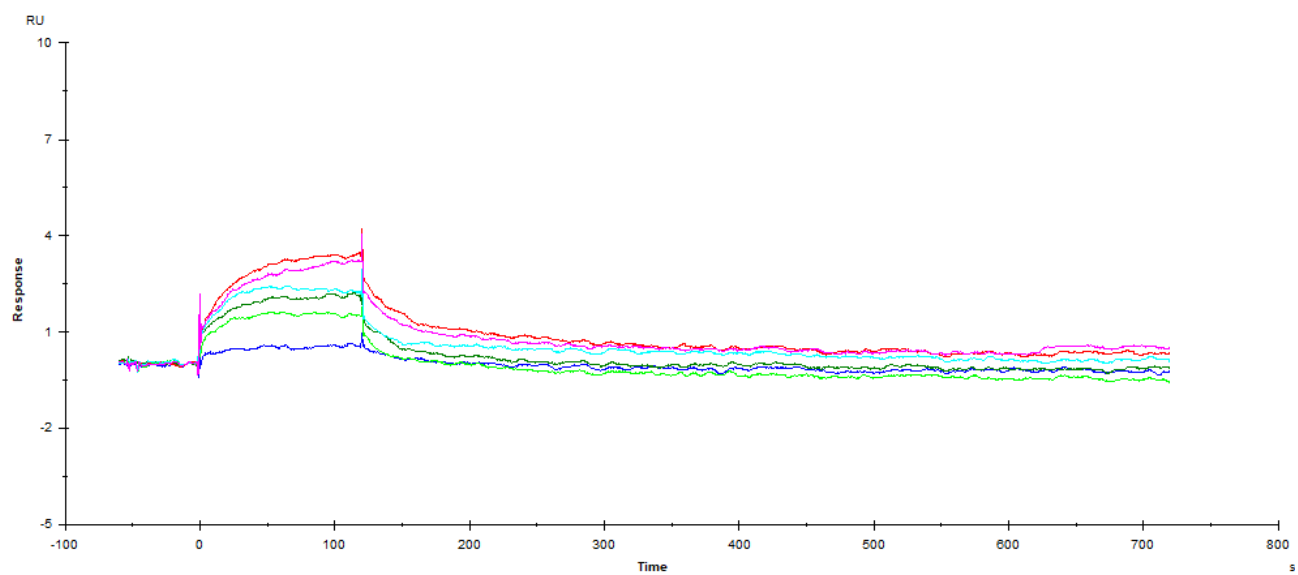

**Figure S9.** SPR sensorgrams between HA (immobilized on the sensor chip surface) and the compound **3**.

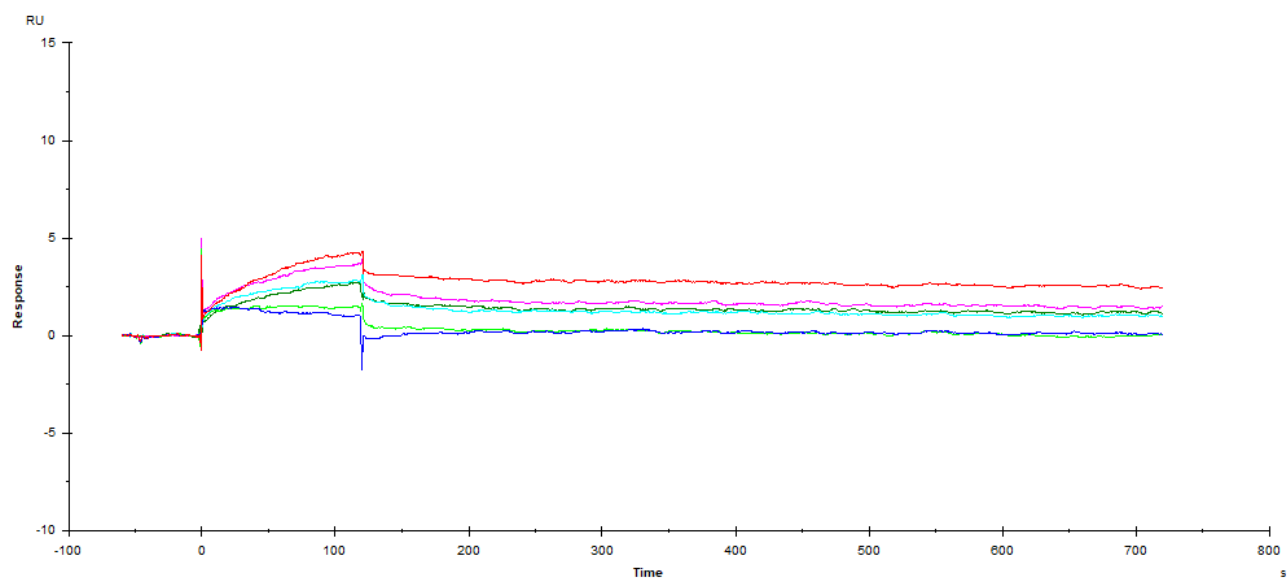

**Figure S10.** SPR sensorgrams between HA (immobilized on the sensor chip surface) and the compound **5**.

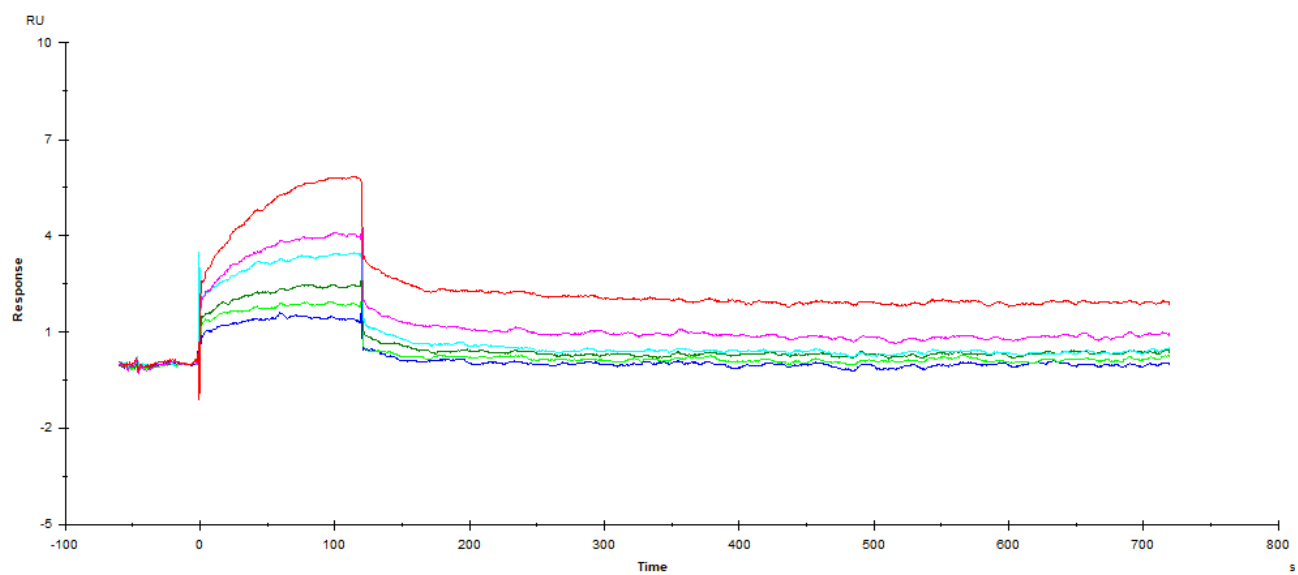

**Figure S11.** SPR sensorgrams between HA (immobilized on the sensor chip surface) and the compound **6**.

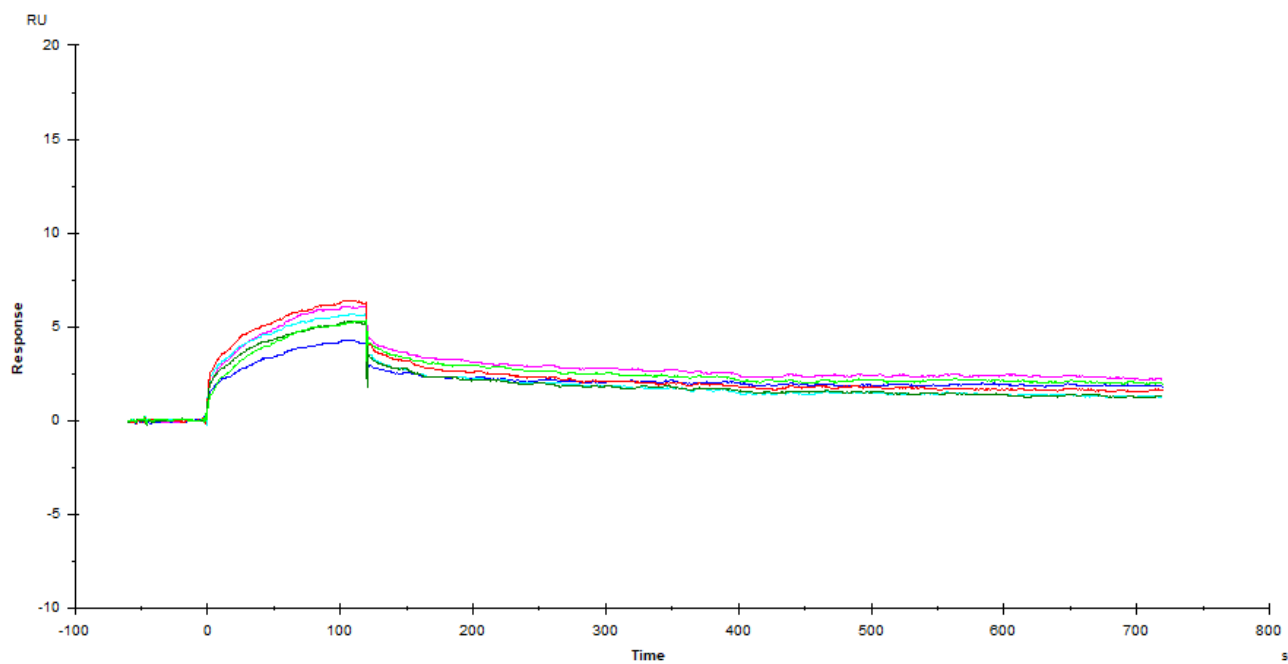

**Figure S12.** SPR sensorgrams between HA (immobilized on the sensor chip surface) and the compound **7**.

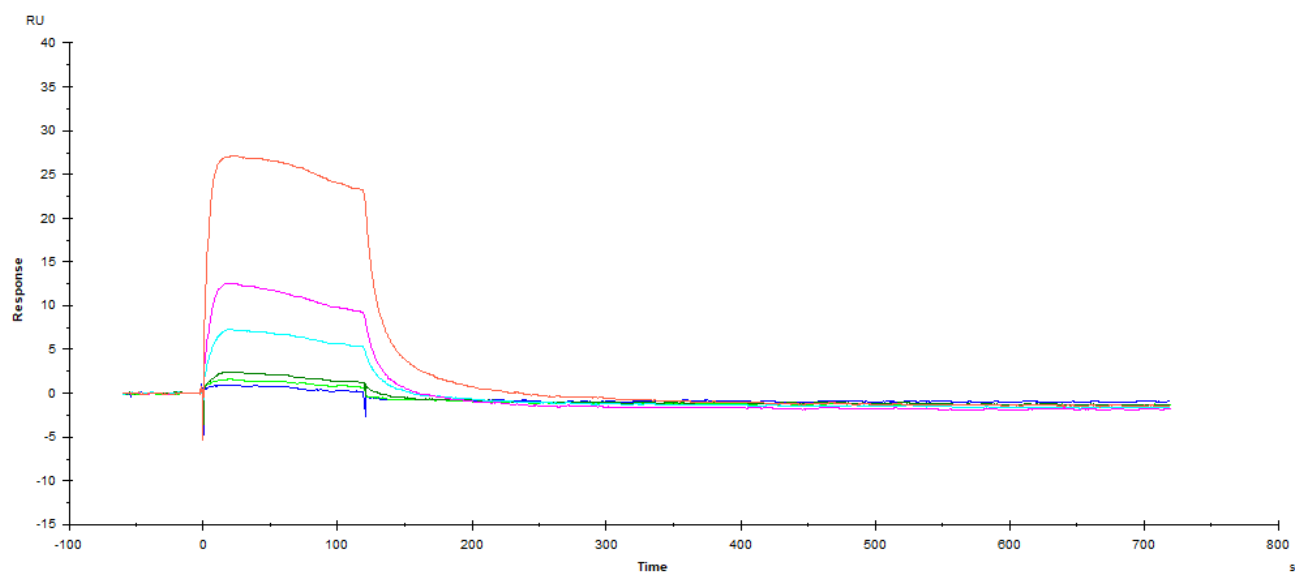

**Figure S13.** SPR sensorgrams between HA (immobilized on the sensor chip surface) and the compound **8**.

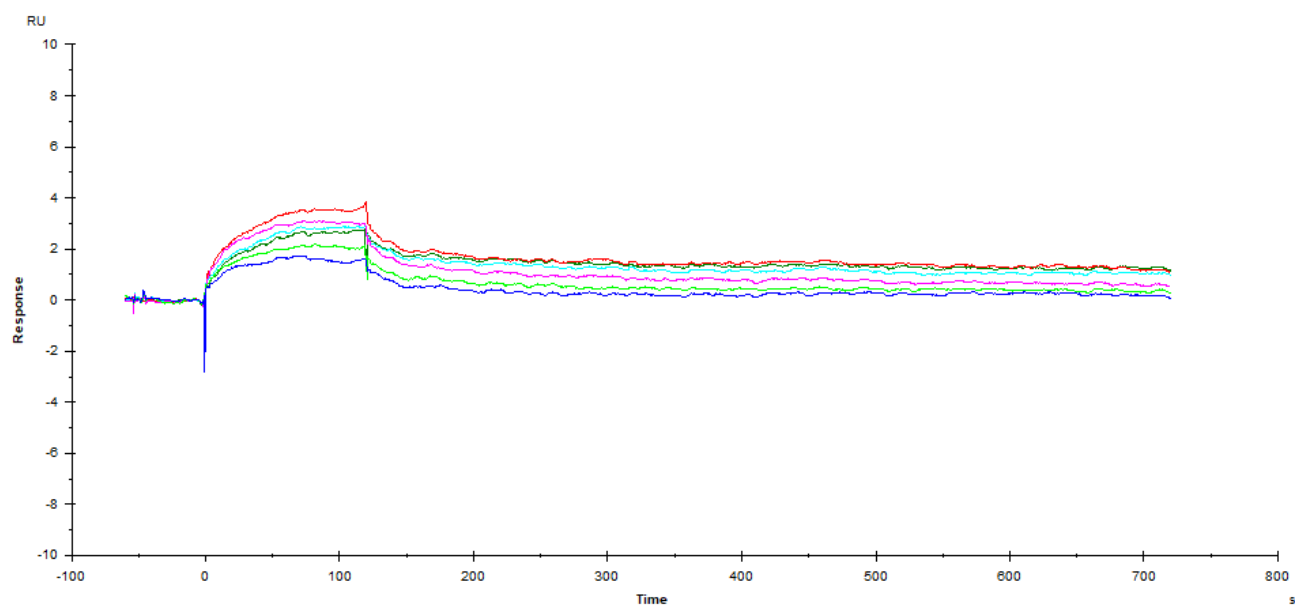

**Figure S14.** SPR sensorgrams between HA (immobilized on the sensor chip surface) and the compound **9**.

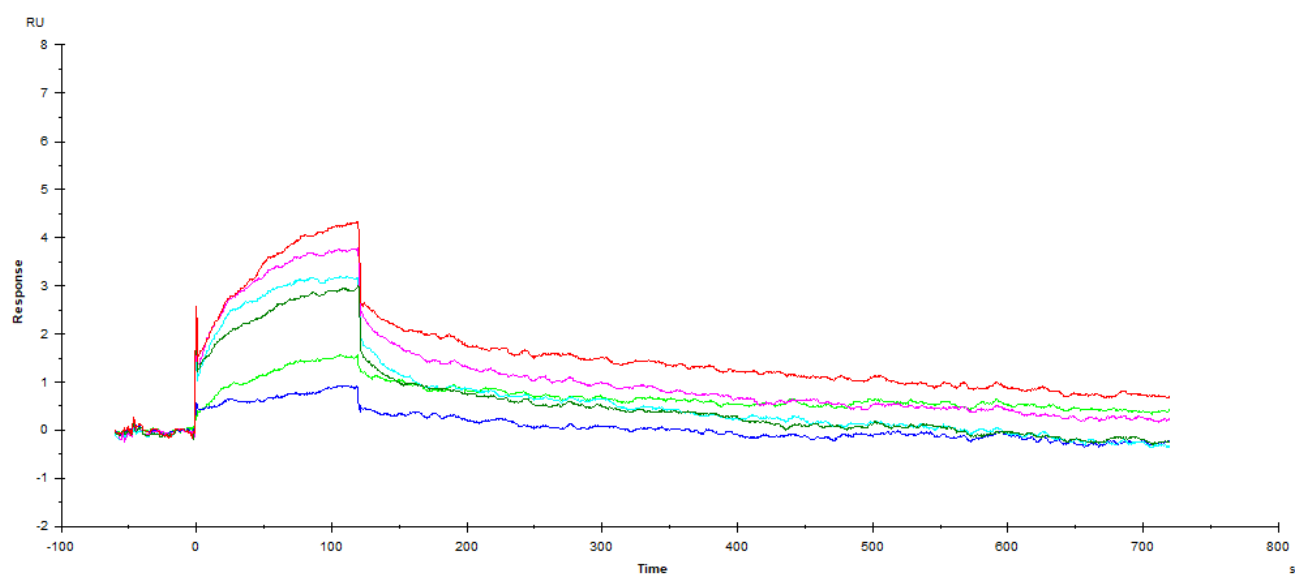

**Figure S15.** SPR sensorgrams between HA (immobilized on the sensor chip surface) and the compound **10**.

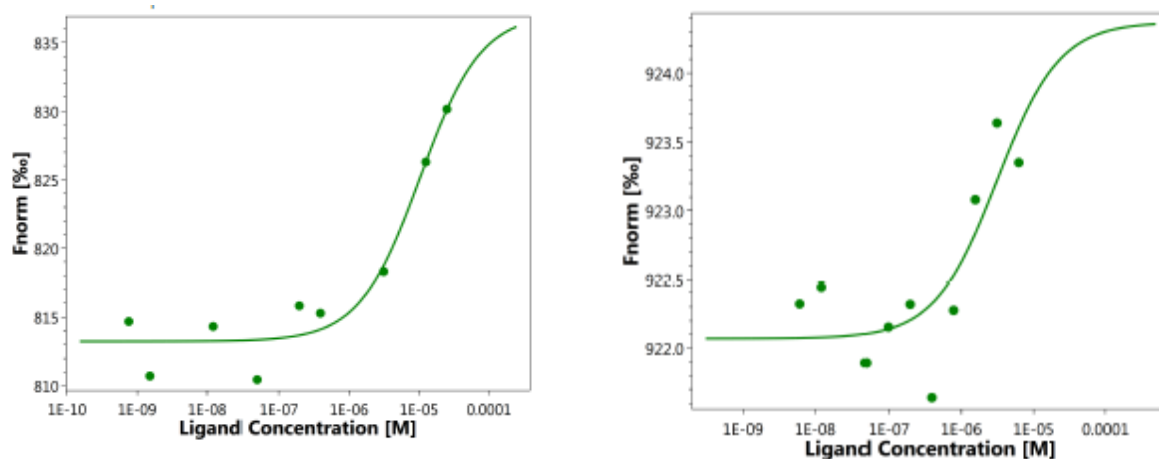

**Figure S16.** MST binding curve of peptide **2-3** to HA.

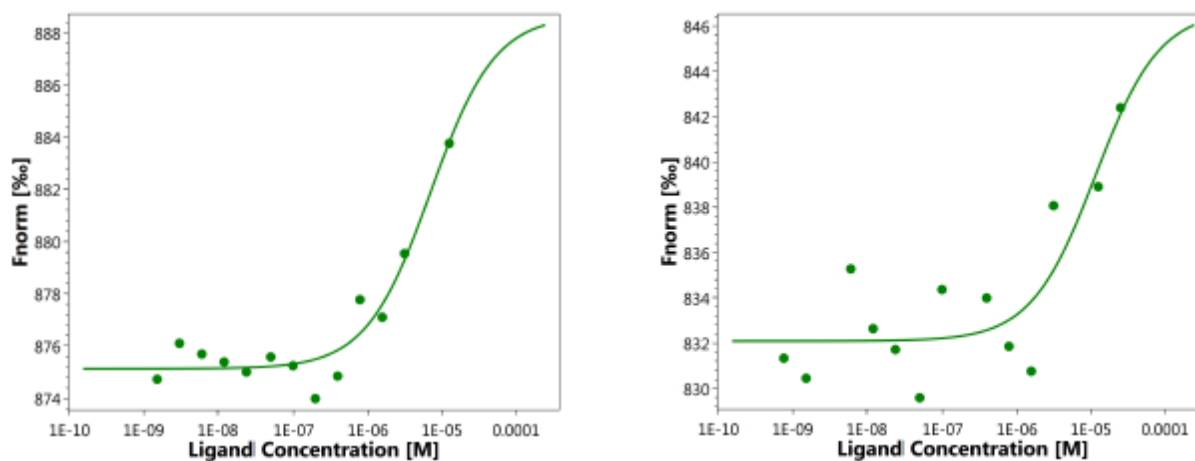

**Figure S17.** MST binding curve of peptide **5-6** to HA.

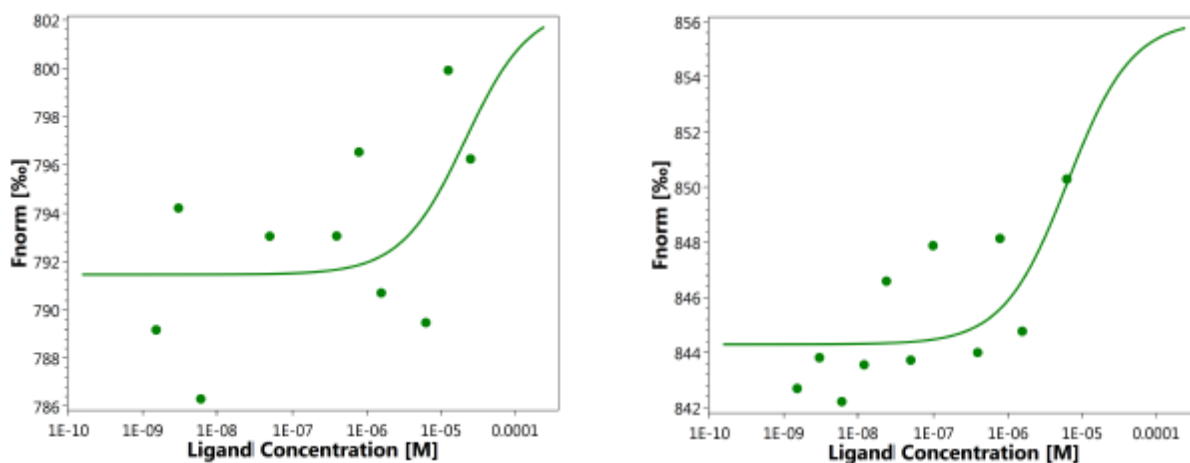

**Figure S18.** MST binding curve of peptide 7-8 to HA.

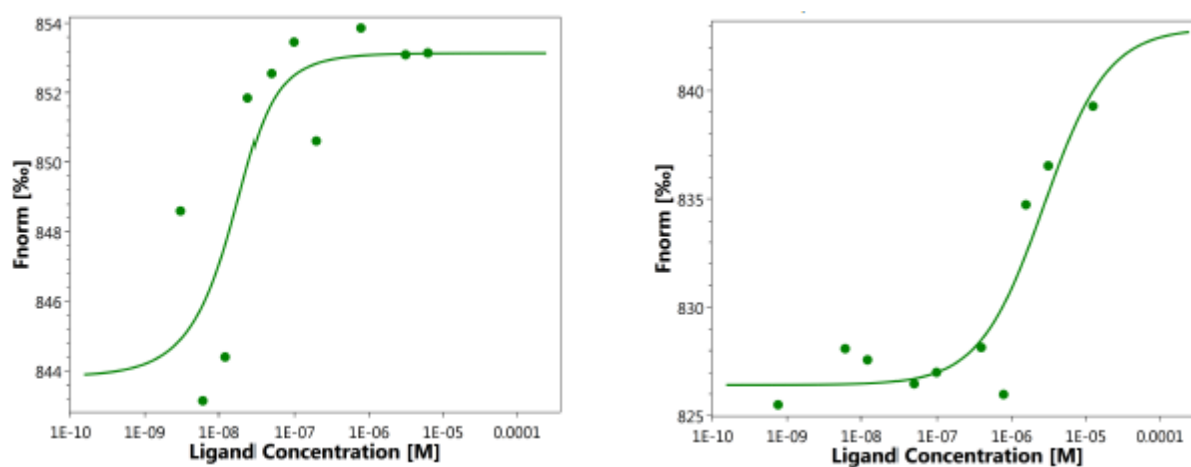

**Figure S19.** MST binding curve of peptide 9-10 to HA.

**Table S2.** Best ranking templates used for model generation in Swiss-Model for each HA

| Structure  | Template               | Seq Identity | Oligo-state    | QSQE | Found by | Method | Resolution | Seq Similarity | Coverage |
|------------|------------------------|--------------|----------------|------|----------|--------|------------|----------------|----------|
| Parma_H1N1 | 6wcr.1                 | 85.92        | hetero-3-3-mer | 0.95 | HHblits  | X-ray  | 2.68Å      | 0.58           | 0.90     |
| Roma_H1N1  | 6wcr.1                 | 85.95        | hetero-3-3-mer | 0.96 | HHblits  | X-ray  | 2.68Å      | 0.58           | 0.90     |
| Parma_H3N2 | <a href="#">6aop.1</a> | 98.17        | hetero-3-3-mer | 0.97 | HHblits  | X-ray  | 2.30Å      | 0.62           | 0.90     |

**Table S3.** Score values obtained for the best homology models

| Structure  | Built with    | Oligo-state    | GMQE | QMEAN |
|------------|---------------|----------------|------|-------|
| Parma_H1N1 | ProMod3 3.1.1 | hetero-3-3-mer | 0.85 | -0.16 |
| Roma_H1N1  | ProMod3 3.1.1 | hetero-3-3-mer | 0.84 | -0.08 |
| Parma_H3N2 | ProMod3 3.1.1 | hetero-3-3-mer | 0.90 | -0.06 |

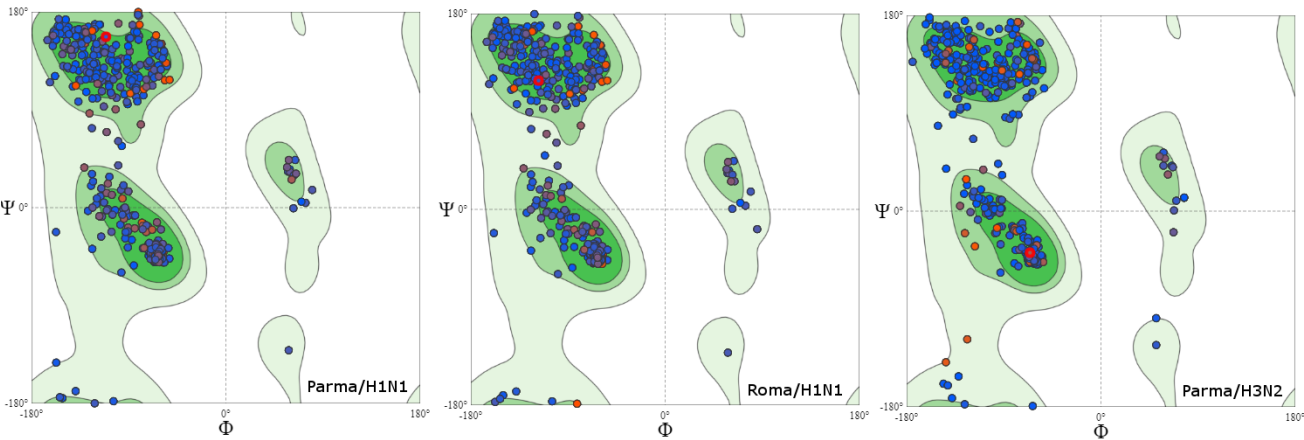

**Figure S20.** Ramachandran Plots obtained for HA homology models

|            |     |                                                            |
|------------|-----|------------------------------------------------------------|
| H1N1_Parma | 1   | -----STDVTDTVLEKNVTVTHSVNLLENSHNGKLCCLKGIA                 |
| H1N1_Roma  | 1   | ANNSTDVTDTVLEKNVTVTHSVNLLENSHNGKLCCLKGIA                   |
| H1N1_Parma | 38  | PLQLGNCSVAGWILGNPECELLISKESWSYIVEKPNPENG                   |
| H1N1_Roma  | 41  | PLQLGNCSVAGWILGNPECELLISKESWSYIVEKPNPENG                   |
| H1N1_Parma | 78  | TCYPGHFADYEELREQLSSVSSFERFEIFPKESSWPNHTV                   |
| H1N1_Roma  | 81  | TCYPGHFADYEELREQLSSVSSFERFEIFPKESSWPNHTV                   |
| H1N1_Parma | 118 | TGVS--SCSHNGEN <b>NS</b> FYRNLLWLTGKNGLYPNLSKSYANNK        |
| H1N1_Roma  | 121 | TGVS <b>AS</b> CSHNGE <b>SS</b> FYRNLLWLTGKNGLYPNLSKSYANNK |
| H1N1_Parma | 157 | EKEVLVLWGVHHPN <b>IA</b> DQK <b>T</b> LYHTENAYVSVVSSHYSRK  |
| H1N1_Roma  | 161 | EKEVLVLWGVHHPN <b>IG</b> DQK <b>A</b> LYHTENAYVSVVSSHYSRK  |
| H1N1_Parma | 197 | FTPEIAKRPKVRDQEGRINYWTLLPEGDTIIFEANGNLI                    |
| H1N1_Roma  | 201 | FTPEIAKRPKVRDQEGRINYWTLLPRDTIIFEANGNLI                     |
| H1N1_Parma | 237 | APRYAFALSRGFGSGIINSNAPMDKCDAKCQTPQGAINSS                   |
| H1N1_Roma  | 241 | APRYAFALSRGFGSGIINSNAPMDKCDAKCQTPQGAINSS                   |
| H1N1_Parma | 277 | LPFQNVHPVTIGECPKYVRSAKLRMVTGLRNIPSGLFGAI                   |
| H1N1_Roma  | 281 | LPFQNVHPVTIGECPKYVRSAKLRMVTGLRNIPS-----GAI                 |
| H1N1_Parma | 7   | AGFIEGGWTGMVDGWYGYHHQNEQGSGYAADQKSTQNAIN                   |
| H1N1_Roma  | 4   | AGFIEGGWTGMVDGWYGYHHQNEQGSGYAADQKSTQNAIN                   |
| H1N1_Parma | 47  | GITNKVNSVIEKMNTQFTAVGKEFNKLERRMENLNKKVDD                   |
| H1N1_Roma  | 44  | GITNKVNSVIEKMNTQFTAVGKEFNKLERRMENLNKKVDD                   |
| H1N1_Parma | 87  | GFIDIWTYNAELLVLENERTLDFHDSNVKNLYEKVKSQL                    |
| H1N1_Roma  | 84  | GFIDIWTYNAELLVLENERTLDFHDSNVKNLYEKVKSQL                    |
| H1N1_Parma | 127 | KNNAKEIGNGCFEFYHKCNDECMESVKNGTYDYPKYSEES                   |
| H1N1_Roma  | 124 | KNNAKEIGNGCFEFYHKCNDECMESVKNGTYDYPKYSEES                   |
| H1N1_Parma | 167 | KLNRE-----STDVTDTVLEKNVTVTHSVNLLENSHNGKLCL                 |
| H1N1_Roma  | 164 | KLNREANNSTDVTDTVLEKNVTVTHSVNLLENSHNGKLCL                   |

**Figure S21.** Alignment of HA sequences of A/Parma and A/Roma H1N1 strains



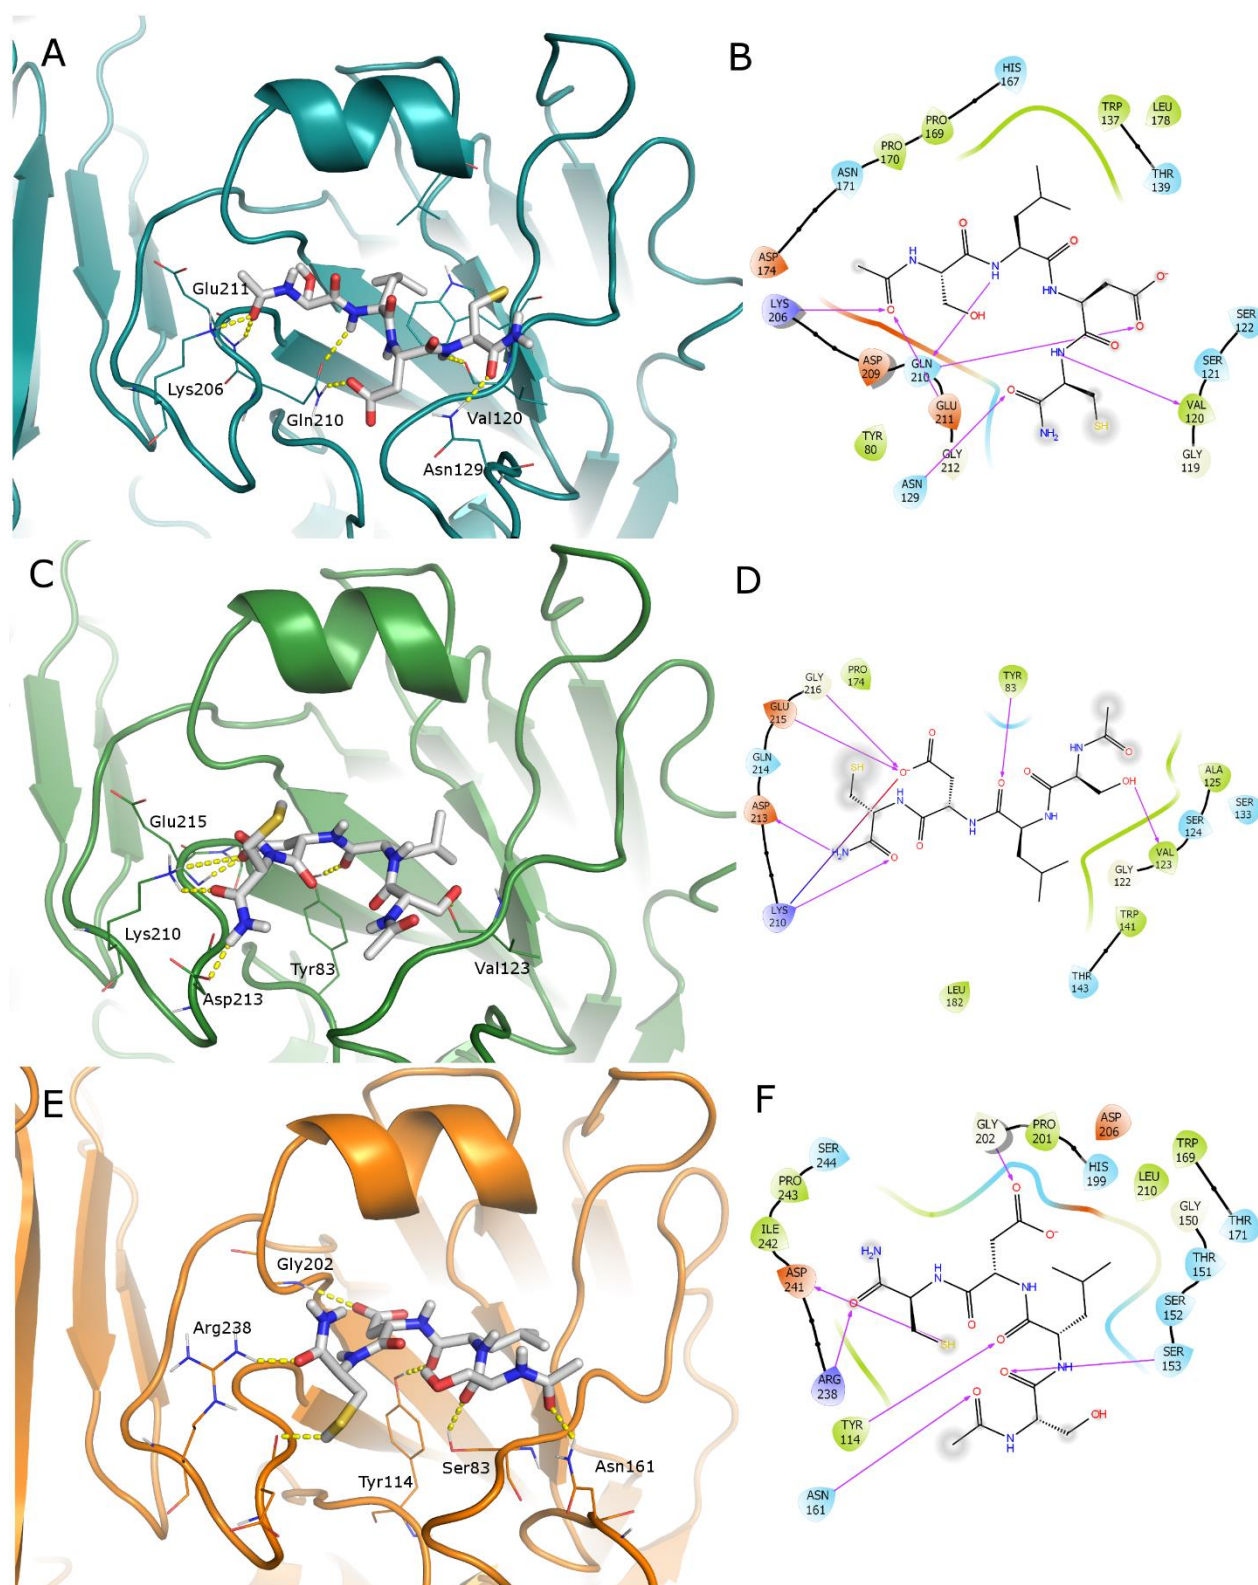

**Figure S22.** Docked poses of peptide **2** (white C atoms, represented as stick) in the RBS of studied HAs represented as cartoon: A) Parma/H1N1 (deep-cyan); B) Roma/H1N1 (dark green); C) Parma/H3N2 (orange). Residues involved in H-bond interactions with the ligand are represented as lines; H-bond are depicted as yellow dashed lines. Corresponding 2D ligand interaction diagrams are reported in panels B), D) and E); in the diagrams residues close to the ligand are coloured on the basis of their properties (orange, negatively charged; blue, positively charged; green, hydrophobic; cyan, polar), H-bonds are depicted as magenta arrows, solvent exposed atoms are surrounded by a grey shadow.

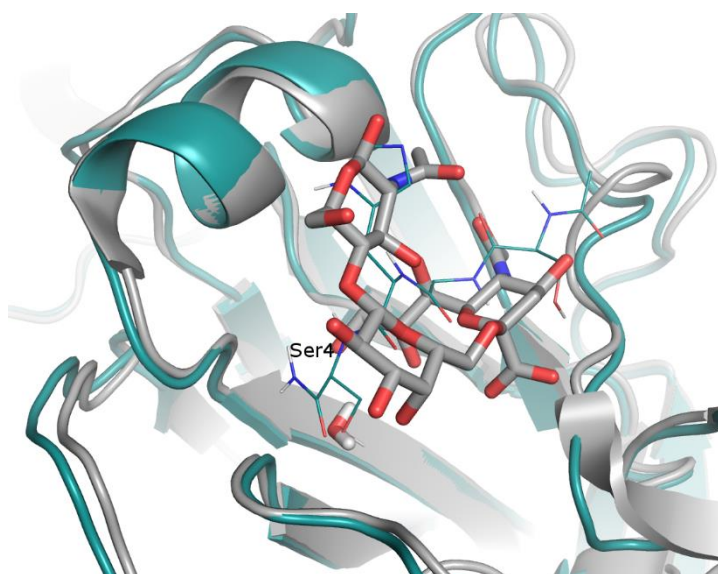

**Figure S23.** Superposition of the complex of HA:sialic acid (PDB ID 3UBN, grey carbon atoms) with docked pose of SAHS in the A/Parma/24/09 H1N1 (deepcyan carbon atoms). Proteins are represented as cartoon. Sialic acid and conserved water molecule are represented as stick, while the SAHS is represented as thin stick.
